# Supplementary material for: Functional Characterization of the GNAT Family Histone Acetyltransferase Elp3 and GcnE in Aspergillus fumigatus
Source: MDPI journal article supplement (doi:10.3390/ijms24032179), 2023-01-22
Supplement: s1 [file s1]

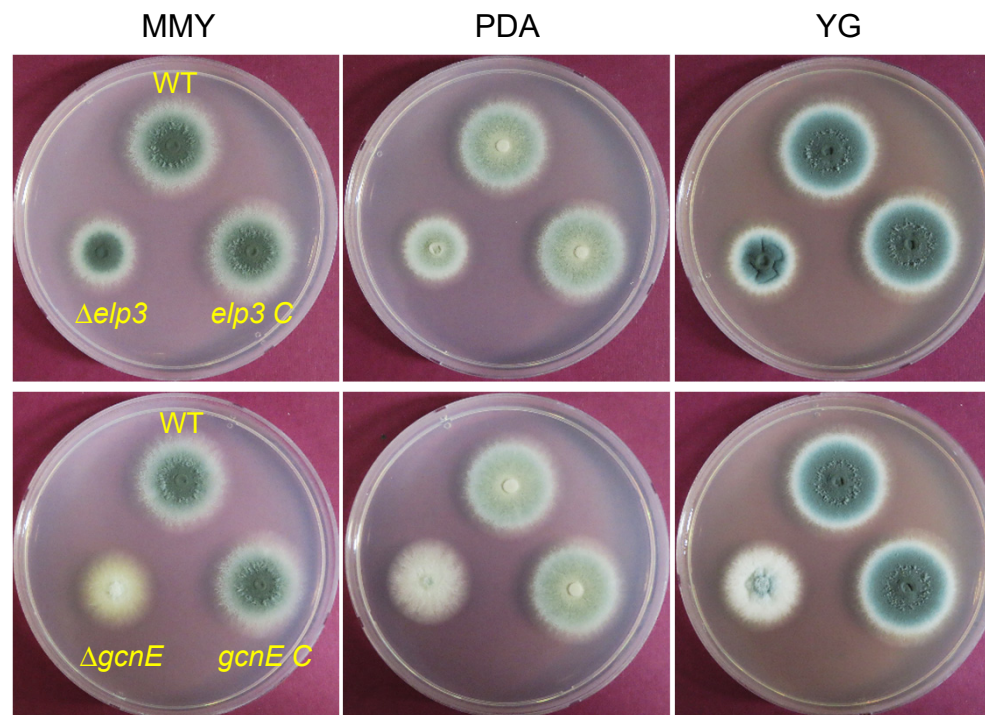

Figure S1. Colony photographs of WT,  $\Delta elp3$ ,  $\Delta gcnE$  and relevant complemented strains. Each strain was point-inoculated on various solid media and grown for 2 days.
