# Supplementary material for: Functional Characterization of the GNAT Family Histone Acetyltransferase Elp3 and GcnE in Aspergillus fumigatus
Source: MDPI journal article supplement (doi:10.3390/ijms24032179), 2023-01-22
Supplement: s1 [file s1]

**Table S1. Oligonucleotides used in this study.**

| Name      | Sequence (5'→3') <sup>a</sup> | Purpose                                 |
|-----------|-------------------------------|-----------------------------------------|
| oligo 256 | TTCCAAGCAGAGCTTGTCAC          | 5' <i>brlA</i> for qRT-PCR              |
| oligo 257 | CCAGGTTCTTTGCACTTGAA          | 3' <i>brlA</i> for qRT-PCR              |
| oligo 271 | AAATCCATCACATCCACCCT          | 5' <i>gliZ</i> for qRT-PCR              |
| oligo 272 | GGTTGTTCATGGTCAGTTGC          | 3' <i>gliZ</i> for qRT-PCR              |
| oligo 303 | GCTACCACTCTGCATCCTCA          | 5' <i>abaA</i> for qRT-PCR              |
| oligo 304 | TACGAGCTCCAGCATGATTC          | 3' <i>abaA</i> for qRT-PCR              |
| oligo 305 | ACGGCAGGAAGTTGTCTTCT          | 5' <i>wetA</i> for qRT-PCR              |
| oligo 306 | CTGTCAGCGACTTGTTGGAT          | 3' <i>wetA</i> for qRT-PCR              |
| oligo 319 | GGGATCTGATTCACATGCAG          | 5' <i>laeA</i> for qRT-PCR              |
| oligo 320 | GATGGGAATAAATCCTCCGA          | 3' <i>laeA</i> for qRT-PCR              |
| oligo 346 | CCATGTGTGTCGAGTCCTTC          | 5' <i>efl</i> for qRT-PCR normalization |
| oligo 347 | GAACGTACAGCAACAGTCTGG         | 3' <i>efl</i> for qRT-PCR normalization |
| oligo 430 | TTCCAAATGTGGCAAGTGAT          | 5' <i>acyA</i> for qRT-PCR              |
| oligo 431 | GCAAACGTGGAATCAATACG          | 3' <i>lacyA</i> for qRT-PCR             |
| oligo 434 | CCACCACCTACAACAACAGC          | 5' <i>pkaC1</i> for qRT-PCR             |
| oligo 435 | TGTGAAGACGCATGATGAGA          | 3' <i>pkaC1</i> for qRT-PCR             |

---

|            |                                                      |                                        |
|------------|------------------------------------------------------|----------------------------------------|
| oligo 697  | GCAATGTAAAGCTAACGTGCGTG                              | 5' <i>AnpyrG</i> marker                |
| oligo 698  | TGCCTTTAAGCTTCGGGTAGAG                               | 3' <i>AnpyrG</i> marker                |
| oligo 1208 | TCCAAGCTGATGGAGCAGAA                                 | 5' <i>cyp51A</i> for qRT-PCR           |
| oligo 1209 | GTGAATCGCGCAGATAGTCC                                 | 3' <i>cyp51A</i> for qRT-PCR           |
| oligo 1210 | GCGGGTCAACATTCTTCCTC                                 | 5' <i>cyp51B</i> for qRT-PCR           |
| oligo 1211 | GAGGCAAGTCAGATCCGAGA                                 | 3' <i>cyp51B</i> for qRT-PCR           |
| oligo 1278 | CGCGCAGAGAAGACAACCACAT                               | 5' <i>stuA</i> for qRT-PCR             |
| oligo 1279 | TGCATAGGGCCAATCTTCACAACA                             | 3' <i>stuA</i> for qRT-PCR             |
| oligo 1320 | AGGACTGGACACAGTGGATG                                 | 5' <i>srbA</i> for qRT-PCR             |
| oligo 1321 | CTAGGCGAAGCATTTCAGT                                  | 3' <i>srbA</i> for qRT-PCR             |
| oligo 1468 | GCCCTACGATGTAGAAAGGA                                 | 5' flanking region of <i>elp3</i>      |
| oligo 1469 | <i>CTGATCTACCCCTTGGAACGCAGCACTAACTCGGATAAGCACGAG</i> | 3' <i>elp3</i> with <i>AnpyrG</i> tail |
| oligo 1470 | <i>TTTGTAGGCTTTGGGCTGTTCACTGCGACGATGGCAGATC</i>      | 5' <i>elp3</i> with <i>AnpyrG</i> tail |
| oligo 1471 | AGTAGACGCTCATTGGACCT                                 | 3' flanking region of <i>elp3</i>      |
| oligo 1472 | GCGACTGAACTTACAGGAGC                                 | 5' nested of <i>elp3</i>               |
| oligo 1473 | GCGGCTAGGTGGATCAATG                                  | 3' nested of <i>elp3</i>               |
| oligo 1474 | CCGAGAGCTTGAGGACAGT                                  | 5' flanking region of <i>gcnE</i>      |
| oligo 1475 | <i>TTTGTAGGCTTTGGGCTGTTCACTCTGGCTTCTTCAACATCC</i>    | 5' <i>gcnE</i> with <i>AnpyrG</i> tail |

---

|            |                                                                   |                                                          |
|------------|-------------------------------------------------------------------|----------------------------------------------------------|
| oligo 1476 | <i>CTGATCTACCCCTTGGAACGCAGCACTTCATTTTGAAGCGACGGAG</i>             | 3' <i>gcnE</i> with <i>AnpyrG</i> tail                   |
| oligo 1477 | GCGAATGCTGGGATGTGTG                                               | 3' flanking region of <i>gcnE</i>                        |
| oligo 1478 | CCGTGATGGCGTTGTGTAG                                               | 5' nested of <i>gcnE</i>                                 |
| oligo 1479 | CGAGGGACCAGCTTCTGTAA                                              | 3' nested of <i>gcnE</i>                                 |
| oligo 1561 | GCTGCAAGTAGGCGTTTACA                                              | 5' <i>medA</i> for qRT-PCR                               |
| oligo 1562 | GCACGGCCATCTTCATATCC                                              | 3' <i>medA</i> for qRT-PCR                               |
| oligo 1563 | CCCTCTCGACCAGTACATCC                                              | 5' <i>uge3</i> for qRT-PCR                               |
| oligo 1564 | CCAATGTTGTGTGACTGCCA                                              | 3' <i>uge3</i> for qRT-PCR                               |
| oligo 1581 | GCAAGAAAGGCAACAGCAAC                                              | 5' <i>somA</i> for qRT-PCR                               |
| oligo 1582 | GCATATTGAGCGGACCCATC                                              | 3' <i>somA</i> for qRT-PCR                               |
| oligo 1663 | GTCAATTCCCAACGGCTCTC                                              | 5' <i>gfaA</i> for qRT-PCR                               |
| oligo 1664 | ACGCCATGTTTCAGTTCACC                                              | 3' <i>gfaA</i> for qRT-PCR                               |
| oligo 1691 | <i>TAG TTC TGT TAC CGA GCC GGC</i> TCG TGC TTA TCC GAG TTA G      | 5' <i>elp3</i> with <i>hygB</i> tail for complementation |
| oligo 1692 | <i>GCT CTG AAC GAT ATG CTC CAA</i> CCG TCT TGT CTT TGT TTG ATG TC | 3' <i>elp3</i> with <i>hygB</i> tail for complementation |
| oligo 1693 | <i>TAG TTC TGT TAC CGA GCC GGC</i> TCC GTC GCT TCA AAA TGA AG     | 5' <i>gcnE</i> with <i>hygB</i> tail for complementation |
| oligo 1694 | <i>GCT CTG AAC GAT ATG CTC CAA</i> CAT ACC CAA TGG ATG CAT GGG    | 3' <i>gcnE</i> with <i>hygB</i> tail for complementation |

<sup>a</sup> Tail sequence is in italic.
