# Supplementary material for: Functional Characterization of the GNAT Family Histone Acetyltransferase Elp3 and GcnE in Aspergillus fumigatus
Source: MDPI journal article supplement (doi:10.3390/ijms24032179), 2023-01-22
Supplement: s1 [file s1]

### A. Restriction maps

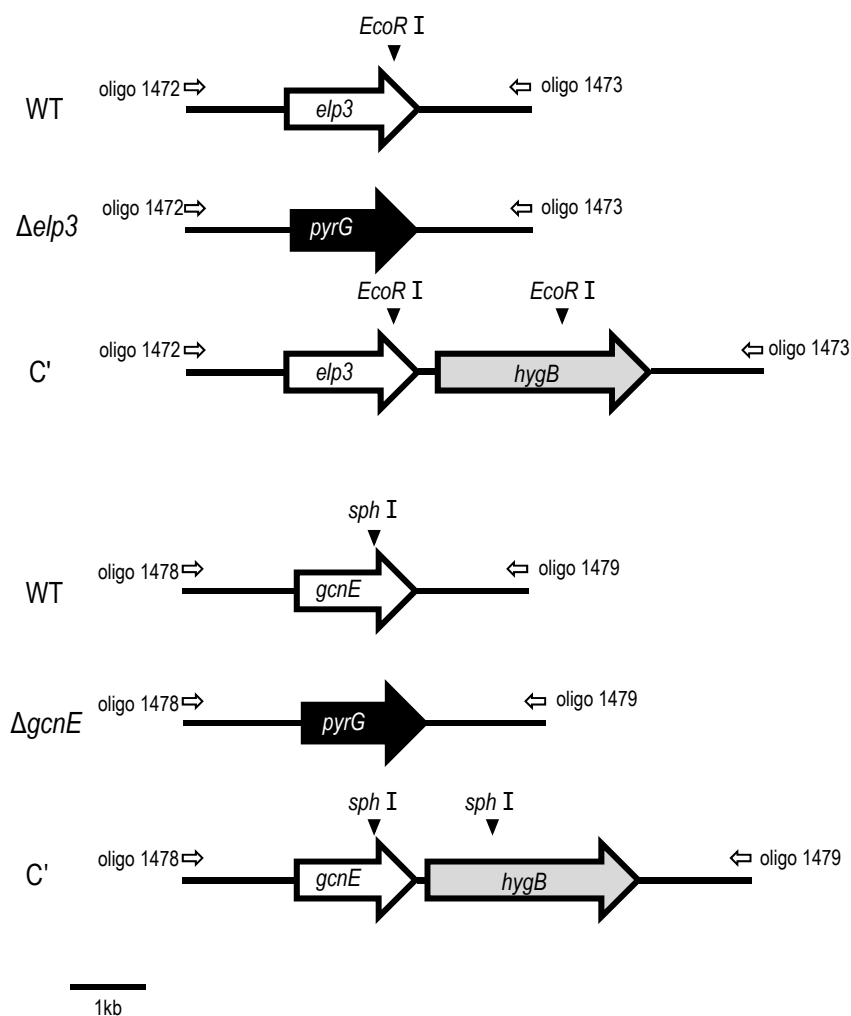

### B. PCR amplicons and cut with *EcoR* I

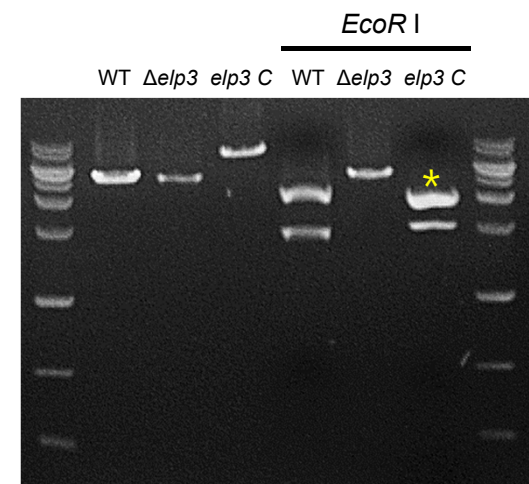

### C. PCR amplicons and cut with *Sph* I

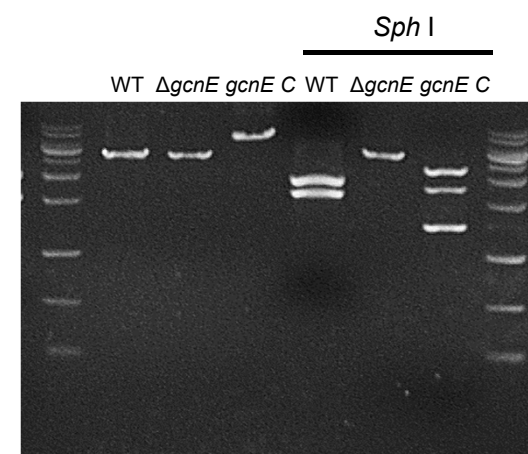

Figure S2. Confirmation of WT, mutants, and complemented strains. (A) Schematic illustration for *elp3* and *gcnE* genes region of WT, mutants, and complemented strains, respectively. (B) PCR results for deletion and complementation of *elp3* and *EcoR* I digestion pattern of the individual amplicons. (C) PCR results for deletion and complementation of *gcnE* and *Sph* I digestion pattern of the individual amplicons. \* indicates two DNA fragments (2,761 and 2,666 bp).
